# Supplementary material for: Absence of cGAS-mediated type I IFN responses in HIV-1–infected T cells
Source: PubMed Central journal article supplement — Proc Natl Acad Sci U S A. 2020 Jul 24;117(32):19475–86. doi: 10.1073/pnas.2002481117 (PMC7431009; doi:10.1073/pnas.2002481117), 2020-07-24

**1 Absence of cGAS-mediated type I IFN responses in HIV-1-infected T cells**

2

3 Carina Elsner<sup>a,b,1</sup>, Aparna Ponnurangam<sup>a,1</sup>, Julia Kazmierski<sup>a,c,d</sup>, Thomas Zillinger<sup>e</sup>, Jenny  
4 Jansen<sup>c,d</sup>, Daniel Todt<sup>f,g</sup>, Katinka Döhner<sup>h</sup>, Shuting Xu<sup>a</sup>, Aurélie Ducroux<sup>a</sup>, Nils Kriedemann<sup>a</sup>,  
5 Angelina Malassa<sup>a</sup>, Pia-Katharina Larsen<sup>i</sup>, Gunther Hartmann<sup>e</sup>, Winfried Barchet<sup>e,j</sup>, Eike  
6 Steinmann<sup>f</sup>, Ulrich Kalinke<sup>i</sup>, Beate Sodeik<sup>h,k</sup>, and Christine Goffinet<sup>a,c,d,2</sup>

7

8

**9 Supplementary Methods****10 Supplementary References****11 Legends of Supplementary Figures 1-8****12 Supplementary Figures 1-8**

13

14

15

16

17

18

19

20

21

22 **Supplementary Methods**

23

24 **Animals**

25 cGAS KO mice on the C57BL/6 background (Mb21d1tm1d(EUCOMM)Hmgu/J, (1)) were  
 26 kindly obtained from Charles Rice. TREX1 KO mice (2) were kindly obtained from Tomas  
 27 Lindahl, Francis Crick Institute. C57BL/6 (wildtype), cGAS KO and TREX1 KO mice were  
 28 bred under specific pathogen-free conditions in the central mouse facility of the Helmholtz  
 29 Centre for Infection Research, Brunswick, and at TWINCORE, Centre for Experimental and  
 30 Clinical Infection Research, Hanover, Germany. Mouse experimental work was carried out  
 31 using 8-week-old to 14-week-old mice in compliance with regulations of the German animal  
 32 welfare law.

33

34 **Cell Lines and Primary Cells**

35 A3.01, SUPT1, Jurkat, CEM T-cells were purchased from ATCC. PM1 T-cells were obtained  
 36 from the NIH AIDS Reagent Program. S1A.TB, R1.1, TIMI.4, were kindly obtained from  
 37 Oliver Keppler. Parental YAC-1 and L1210 cells were kindly obtained from Roland Jacobs,  
 38 Hanover Medical School. CRISPR/Cas9-mediated knockouts were generated by transient  
 39 electroporation of an EF1alpha-Cas9-2A-EGFP/U6-sgRNA expression plasmid, followed by  
 40 FACS-Sorting and single-cell cloning by limiting dilution. CRISPR target sequences were: hs-

41 cGAS – GGCCGCCCGTCCGCGCAACT(GGG); mm-cGAS -  
 42 GCTGGGGCTCCCGTACGGC(GGG); hsTREX1 –  
 43 GAGAGCTTGTCTACCACACG(CGG); mmTrex1 -  
 44 GTCCACCACACGGGGCGGTC(TGG). Knockouts were validated by Sanger sequencing of

45 PCR-amplified genomic loci and Immunoblot. Primer-Sequences (fw/rev): mm-cGAS genomic  
 46 - GATCGCGGCGGGCGGAGCGT/ACAACCTTATTACCGTCTCGGC; hs-cGAS  
 47 genomic – GCGGCTGAGCTTCAACTTCTC/TGCTGCTGGCTCTTCTCTTG; mm-Trex1

48 genomic – ATGGGCTCACAGACCCTGC/CTGCCAGGTGAGGCCAG; hsTREX1  
49 genomic – CCATGCAGACCCTCATCTTTTTC/GGGGGAAGTCGTAGCGGT. Parental  
50 HEK293T cells and HEK293T cells expressing cGAS (clone 17) are described in (3). Parental  
51 THP-1, cGAS KO THP-1 and Jurkat T cells stably expressing wildtype cGAS and cGAS  
52 (G212A/S213A) are described in (4).

53 Withdrawal of blood samples from healthy humans and cell isolation were conducted with  
54 approval of the full study of the local ethics committees (Ethical review committee of Hannover  
55 Medical School, vote ID 3025-2016; Ethical review committee of Charité –  
56 Universitätsmedizin Berlin, vote ID EA4/167/19). Human PBMCs were isolated from buffy  
57 coats by Ficoll-Hypaque centrifugation. PBLs were generated by IL-2 (10 ng/ml)/PHA (1  
58 µg/ml) stimulation of PBMCs for 3-4 days, resulting in >90% CD3<sup>+</sup> T-cell cultures. Purification  
59 of human CD4<sup>+</sup> T-cells was performed by negative selection using EasySep Direct Human  
60 CD4<sup>+</sup> T-Cell Isolation kit (Stemcell Technologies). Isolated cells were either lysed directly after  
61 purification or activated by IL-2 (10 ng/ml)/PHA (1 µg/ml) in RPMI 1640 (Sigma-Aldrich)  
62 containing 10% heat-inactivated fetal calf serum (Sigma-Aldrich), 1% penicillin-streptomycin  
63 (Thermo Fisher Scientific) and 2 mM L-glutamine (Thermo Fisher Scientific). Infection assays  
64 were performed in the presence of IL-2 (10 ng/ml).

65 Single-cell suspensions of mouse splenocytes were prepared by pushing spleen tissue pieces  
66 through a 70 µm pore size nylon mesh screen (Fisher Scientific). Washed splenocytes were  
67 subjected to CD4<sup>+</sup> T-cell isolation using the EasySep Mouse CD4<sup>+</sup> T-Cell Isolation kit  
68 (Stemcell Technologies). CD4<sup>+</sup> T-cells were cultured at  $2 \times 10^6$ /ml in RPMI 1640 containing  
69 10% heat-inactivated fetal calf serum (Sigma-Aldrich), 1% penicillin-streptomycin (Thermo  
70 Fisher Scientific) and 2 mM L-glutamine (Thermo Fisher Scientific). Isolated cells were either  
71 lysed directly after purification or were stimulated for 3 to 4 days with mouse anti-CD4/CD28  
72 beads (Gibco) using a bead-to-cell ratio of 0.5:1 and IL-2 (50 ng/ml).

73

74 **Viruses**

75 HIV-1<sub>Ba-L</sub> was obtained from the NIH AIDS Reagent Program and propagated on PM1 T-cells.  
76 Virus-containing supernatant was filtered through a nylon filter of 0.2  $\mu\text{m}$  pore size (VWR  
77 International) and stored at  $-80^{\circ}\text{C}$  in aliquots.  
78 HSV-1  $\Delta\text{UL41N}$  (HSV-1(KOS) UL41NHB) was kindly provided by David A. Leib (5). It  
79 encodes a truncated version of pUL41, which fails to induce the degradation of cellular mRNAs  
80 and is unable to counteract cGAS. To prepare concentrated stocks, extracellular virions were  
81 pelleted from the medium of cells infected with a multiplicity of infection (MOI) of 0.01  
82 PFU/cell for 3 days (6, 7). Virus stocks were plaque-titrated on Vero cells (6, 8). To determine  
83 the genome/pfu ratio of HSV-1 stocks, we measured the number of HSV-1 genomes by  
84 quantitative PCR as described previously (7, 9).

85

86 **Lentiviral and Gammaretroviral Particles**

87 VSV-G-pseudotyped HIV-1 GFP particles were generated by calcium phosphate-based  
88 transfection of HEK293T cells with the packaging plasmid pCMV  $\Delta\text{R8.91}$  (10) expressing  
89 wildtype capsid or CA(P90A) or pCMV  $\Delta\text{R8.2}$  (CA N74D), the GFP-encoding transfer plasmid  
90 pHR.GFP (11) and the pCMV-VSV-G plasmid (12). VSV-G-pseudotyped MLV GFP particles  
91 were generated by calcium phosphate-based transfection of HEK293T cells with the packaging  
92 plasmid pCMVi gag-pol (13), the GFP-encoding transfer plasmid pSER S11 SF GFP (14), and  
93 the pCMV-VSV-G plasmid. Virus-containing supernatants were harvested 40 hours and 64  
94 hours post transfection and subjected to ultracentrifugation through a 20% sucrose/PBS  
95 cushion. Virus-containing pellets were resuspended in medium and digested by DNase I  
96 (Promega) twice for 90 min at  $37^{\circ}\text{C}$ . Particles were then pelleted by ultracentrifugation,  
97 resuspended in medium, aliquoted and stored at  $-80^{\circ}\text{C}$  in aliquots.

98

**99 Infections and Transductions**

100 30 min prior to lenti- or retroviral transduction, T-cells were left untreated or treated either with  
101 EFV (100 nM), azidothymidine (AZT) (10  $\mu$ M) or PF74 (2  $\mu$ M). 30 min prior to HSV-1  
102 inoculation, T-cells were left untreated or treated with ACV (20  $\mu$ M). Inhibitor treatment was  
103 maintained during the subsequent virus inoculation. Transduction and HSV-1 inoculation  
104 occurred by spinoculation of 0.5 mio cells/24-well for 60 min at 32°C. Following spinoculation,  
105 cells were resuspended and individual wells were harvested at indicated time points.

106

**107 Intracellular HIV-1 p24CA and HSV-1 VP5 Immunostaining**

108 PBS-washed cells were PFA-fixed and immunostained for intracellular HIV-1 p24CA using  
109 FITC-conjugated mAb KC57 (Beckman Coulter) in 0.1% Triton in PBS. VP5 immunostaining  
110 was performed with rabbit anti-HSV-1 VP5 (#SY4563 (15)) and an appropriate fluorochrome-  
111 conjugated secondary antibody in 0.1% Triton in PBS. A FACS Calibur with BD CellQuest  
112 Pro 4.0.2 Software (BD Pharmingen) and a FACS Lyric with FlowJo software were used for  
113 analysis.

114

**115 Reagents and Inhibitors**

116 IL-2 and PHA were purchased from Miltenyi Biotec and Oxoid, respectively. Anti-mouse  
117 CD3/28 beads were purchased from Gibco. Human IFN- $\alpha$ 2a (Roferon) and mouse IFN- $\alpha$ 1 were  
118 purchased from Roche and PBL Assay Science, respectively. 2'-3'-cGAMP, c-di-UMP and  
119 ISD were purchased from Invivogen. EFV was purchased from Bristol-Myers Squibb. ACV,  
120 AZT and PF74 were purchased from Sigma-Aldrich.

121

122

**123 Quantitative RT-PCR**

124 Total RNA extraction from cells and DNase treatment were performed with Maxwell LEV  
125 simplyRNA purification Kit (Promega), followed by cDNA synthesis (NEB, Invitrogen).  
126 Quantification of relative mRNA levels was performed with the 7500 Fast Real-Time PCR  
127 System (Applied Biosystems) or the ABI7500 Real Time PCR System using Taq-Man PCR  
128 technology with the following oligonucleotide primers from MWG: For human *cGAS* (gene ID  
129 115004), *IFN-β* (gene ID 3456), *IFIT1* (gene ID 3434), *MX2* (gene ID 4600) and mouse *Ifit1*  
130 (gene ID 15957), and *Mx2* (gene ID 17858) premade primer-probe kits were used (Applied  
131 Biosystems). Relative mRNA levels were determined using the  $\Delta\Delta C_t$  method with human  
132 *RNASEP* mRNA or mouse *Gapdh* mRNA (Applied Biosystems) as internal references. Each  
133 sample was analyzed in triplicates. Data analysis was performed using Applied Biosystems  
134 7500 Fast System Software.

135

**136 Quantitative PCR of viral DNA**

137 DNA extraction from cells were performed with Maxwell 16 Blood DNA purification kit  
138 (Promega). Quantification of absolute copy numbers of HIV-1 late RT products was performed  
139 with the 7500 Fast Real-Time PCR System (Applied Biosystems) using a published Taq-Man-  
140 based PCR (16).

141 The number of HSV-1 genomes was quantified as described previously (7, 9) using the  
142 LightCycler FastStart DNA Master HybProbe kit (Roche Diagnostics, Mannheim, Germany),  
143 the forward sense primer 5'-CCACGAGACCGACATGGAGC-3', the reverse antisense primer  
144 5'-GTGCTYGGTGTGCGACCCCTC-3', the fluorescein-coupled donor probe 5'-  
145 TGTTGGCGACTGGCGACTTTG-3'-fluorescein, and the R640-coupled acceptor probe  
146 R640-5'-TACATGTCCCCGTTTTACGGCTACCGG-3'-phosphate, which are all specific to  
147 the coding region of HSV-1 gB (gene UL27), and the Roche Light-Cycler 1.5. After one cycle

148 of denaturation (95°C for 10 min), 55 cycles of amplification were performed (95°C for 10 s,  
149 58°C for 15 s, and 72°C for 15 s). During the 58°C phases, the acceptor fluorescence was  
150 measured at 640 nm, and from these data the DNA concentrations of the samples were  
151 calculated using standards of known DNA concentrations.

152

### 153 **Human and Mouse Type I IFN Bioactivity Assays**

154 Secretion of human type I interferon bioactivity was quantified using the human reporter cell  
155 line HL116 that carries the luciferase gene under the control of the IFN-inducible 6-16 promoter  
156 ((17), a kind gift from Sandra Pellegrini, Institut Pasteur, France). Human IFN- $\alpha$ 2a  
157 (Roferon) was diluted for generation of a standard curve.

158 Secretion of murine, bioactive type I IFN was quantified using the mouse reporter cell line MEF  
159 that expresses the luciferase gene under the control of the mouse *Mx2* promoter (18), a kind gift  
160 of Mario Köster. Mouse IFN- $\alpha$ 1 was diluted for generation of a standard curve.

161

### 162 **Electroporation of T-cells**

163 T-cell lines and primary CD4<sup>+</sup> T-cells were challenged with plasmid DNA, cGAMP and c-di-  
164 UMP, and ISD by electroporation. Typically, 10 million cells were pulsed with 24  $\mu$ g plasmid  
165 DNA, 6  $\mu$ g cGAMP or c-di-UMP, and 4  $\mu$ g ISD. The electroporation was conducted at 250 V  
166 for 1 ms using a Gene Pulser Xcell Electroporation System (BioRad).

167

### 168 **Immunoblotting**

169 Cells were lysed with M-PER Mammalian Protein Extraction Reagent (Pierce). Proteins were  
170 run on a 7.5% SDS-PAGE and transferred onto nitrocellulose using a semi-dry transfer system  
171 (Biometra). Blocked membranes were incubated with the following primary antibodies (rabbit  
172 anti-MAPK (#SC-153, Santa Cruz), rabbit-anti- $\beta$ -actin (#ab8227, Abcam), rabbit-anti-human

173 cGAS (#66546) and rabbit anti-mouse cGAS (#31659) (both Cell Signaling Technology),  
174 rabbit anti-pIRF3 (Ser396) (#4947S, Cell Signaling), rabbit anti-STING (#13647, Cell  
175 Signaling Technology), rabbit anti-human TREX1 (#ab185228, Abcam) and mouse anti-mouse  
176 TREX1 (#611987, BD Bioscience). Secondary antibodies conjugated to Alexa680/800  
177 fluorescent dyes were used for detection and quantification by Odyssey Infrared Imaging  
178 System (LI-COR Biosciences).

179

### 180 **RNA Sequencing**

181 Total RNA extraction from primary cells and DNase treatment were performed with Maxwell  
182 LEV simplyRNA purification Kit (Promega). Quality and integrity of total RNA was controlled  
183 on Agilent Technologies 2100 Bioanalyzer (Agilent Technologies; Waldbronn, Germany). The  
184 RNA sequencing library was generated from 100 ng total RNA using NEBNext® Single  
185 Cell/Low Input RNA Library following the manufacturer's protocol. The libraries were  
186 sequenced on Illumina NovaSeq 6000 using NovaSeq 6000 S1 Reagent Kit (100 cycles, paired  
187 end run 2x 50 bp) with an average of  $3 \times 10^7$  reads per RNA sample. Data generated from  
188 individual samples (>30 million read per sample, paired-end read 50-mers) were mapped  
189 separately against the hg38 human reference genome or the HIV-1<sub>BaL</sub> genome (GenBank:  
190 AY713409). Gene expression was calculated for individual transcripts as reads per kilobase per  
191 million bases mapped (RPKM). All transcriptomic analyses were performed using CLC  
192 Genomics Workbench 12.0.3 (Qiagen, Aarhus). Differentially expressed genes (DEGs) were  
193 identified by calculating fold changes in expression, p-values were corrected by taking false  
194 discovery rate (FDR) for multiple comparison into account.

195

196

197



198 **Data Presentation and Statistical Analysis**

199 If not otherwise stated, bars and symbols show the arithmetic mean of indicated amount of  
200 repetitions. Error bars indicate S.D. from one representative experiment out of at least three or  
201 S.E.M. from the indicated amount of individual experiments. Statistical significance was  
202 calculated by performing Student's t-test using GraphPad Prism. *P* values <0.05 were  
203 considered significant (\*) and <0.01 very significant (\*\*); n.s. = not significant ( $\geq 0.05$ ).

204

205 **Supplementary References**

206

- 207 1. Schoggins JW, *et al.* (2014) Pan-viral specificity of IFN-induced genes reveals new roles for  
208 cGAS in innate immunity. *Nature* 505(7485):691-695.
- 209 2. Morita M, *et al.* (2004) Gene-targeted mice lacking the Trex1 (DNase III) 3'→5' DNA  
210 exonuclease develop inflammatory myocarditis. *Mol Cell Biol* 24(15):6719-6727.
- 211 3. Ablasser A, *et al.* (2013) Cell intrinsic immunity spreads to bystander cells via the intercellular  
212 transfer of cGAMP. *Nature* 503(7477):530-534.
- 213 4. Xu S, *et al.* (2016) cGAS-Mediated Innate Immunity Spreads Intercellularly through HIV-1 Env-  
214 Induced Membrane Fusion Sites. *Cell Host Microbe* 20(4):443-457.
- 215 5. Strelow LI & Leib DA (1995) Role of the virion host shutoff (vhs) of herpes simplex virus type  
216 1 in latency and pathogenesis. *J Virol* 69(11):6779-6786.
- 217 6. Sodeik B, Ebersold MW, & Helenius A (1997) Microtubule-mediated transport of incoming  
218 herpes simplex virus 1 capsids to the nucleus. *J Cell Biol* 136(5):1007-1021.
- 219 7. Dohner K, Radtke K, Schmidt S, & Sodeik B (2006) Eclipse phase of herpes simplex virus type  
220 1 infection: Efficient dynein-mediated capsid transport without the small capsid protein  
221 VP26. *J Virol* 80(16):8211-8224.
- 222 8. Dohner K, *et al.* (2002) Function of dynein and dynactin in herpes simplex virus capsid  
223 transport. *Mol Biol Cell* 13(8):2795-2809.
- 224 9. Engelmann I, *et al.* (2008) Rapid quantitative PCR assays for the simultaneous detection of  
225 herpes simplex virus, varicella zoster virus, cytomegalovirus, Epstein-Barr virus, and human  
226 herpesvirus 6 DNA in blood and other clinical specimens. *J Med Virol* 80(3):467-477.
- 227 10. Zufferey R, Nagy D, Mandel RJ, Naldini L, & Trono D (1997) Multiply attenuated lentiviral  
228 vector achieves efficient gene delivery in vivo. *Nat Biotechnol* 15(9):871-875.
- 229 11. Miyoshi H, Takahashi M, Gage FH, & Verma IM (1997) Stable and efficient gene transfer into  
230 the retina using an HIV-based lentiviral vector. *Proceedings of the National Academy of  
231 Sciences of the United States of America* 94(19):10319-10323.
- 232 12. Stewart SA, *et al.* (2003) Lentivirus-delivered stable gene silencing by RNAi in primary cells.  
233 *RNA* 9(4):493-501.
- 234 13. Fletcher AJ, *et al.* (2018) Trivalent RING Assembly on Retroviral Capsids Activates TRIM5  
235 Ubiquitination and Innate Immune Signaling. *Cell Host Microbe* 24(6):761-775 e766.
- 236 14. Schambach A, *et al.* (2006) Overcoming promoter competition in packaging cells improves  
237 production of self-inactivating retroviral vectors. *Gene Ther* 13(21):1524-1533.
- 238 15. Dohner K, *et al.* (2018) Importin alpha1 is required for nuclear import of herpes simplex virus  
239 proteins and capsid assembly in fibroblasts and neurons. *PLoS pathogens* 14(1):e1006823.

- 240 16. Goffinet C, Allespach I, & Keppler OT (2007) HIV-susceptible transgenic rats allow rapid  
241 preclinical testing of antiviral compounds targeting virus entry or reverse transcription.  
242 *Proceedings of the National Academy of Sciences of the United States of America*  
243 104(3):1015-1020.
- 244 17. Uze G, *et al.* (1994) Domains of interaction between alpha interferon and its receptor  
245 components. *Journal of molecular biology* 243(2):245-257.
- 246 18. Kugel D, Pulverer JE, Koster M, Hauser H, & Staeheli P (2011) Novel nonviral bioassays for  
247 mouse type I and type III interferon. *J Interferon Cytokine Res* 31(4):345-349.

248

## 249 **Supplementary Legends**

250

### 251 **Figure S1. cGAS Expression in Primary T-cells**

252 (A) Immunoblotting of lysates of primary IL-2-activated, human CD4<sup>+</sup> T-cells and indicated  
253 THP-1 cells

254 (B) Immunoblotting of lysates of mouse CD4<sup>+</sup> T-cells of indicated genotypes

255 (C) cGAS mRNA expression in indicated cells

256 (D) cGAS mRNA expression in resting and IL-2/PHA-stimulated, human CD4<sup>+</sup> T-cells

257 Error bars indicate S.E.M. from values obtained from cells from three-four individual  
258 experiments.

259

### 260 **Figure S2. Mock Electroporation of Primary CD4<sup>+</sup> T-Cells and PM1 T-Cells Triggers 261 Neglectable Levels of *IFIT1* mRNA Expression**

262 Primary CD4<sup>+</sup> T-cells (A) and parental PM1 T-cells (B) were left untouched, mock-  
263 electroporated or electroporated with plasmid DNA. Cultures were monitored for relative *IFIT1*  
264 mRNA expression 48 hours post electroporation by Q-RT-PCR. Error bars indicate S.E.M.  
265 from values obtained from cells from three individual experiments.

266

### 267 **Figure S3. ISD triggers induction of *IFIT1* and *IFN-β* mRNA expression in THP-1 in a 268 cGAS-dependent fashion**

269 Undifferentiated THP1 cells were mock-transfected or transfected with ISD and cGAMP.  
270 Cultures were monitored at 5 hours post electroporation for relative *IFIT1* and *IFN- $\beta$*  mRNA  
271 expression by Q-RT-PCR. Error bars indicate S.E.M. from values obtained from cells from four  
272 individual experiments.

273

274 **Figure S4. Absence of PF74-induced innate immune responses in primary CD4<sup>+</sup> T-cells**  
275 **infected with HIV-1**

276 **(A-B)** Primary human CD4<sup>+</sup> T-cells were infected with HIV-1<sub>Ba-L</sub> in the absence and presence  
277 of PF74 (2  $\mu$ M) and monitored for:

278 **(A)** HIV-1 p24 capsid expression by intracellular immunostaining by FACS analysis and  
279 assessment by viability (FSC/SSC) three days post-infection

280 **(B)** Relative expression of *IFIT1*, *MX2* and *IFN- $\beta$*  at indicated time points by Q-RT-PCR.

281 Error bars show S.E.M. from values obtained from CD4<sup>+</sup> T-cells from three individual donors.

282

283 **Figure S5. Analysis of the cGAS/STING pathway in human T-cell lines**

284 Indicated human T-cell lines were either mock-electroporated or electroporated with plasmid  
285 DNA **(A)**, and electroporated either with c-di-UMP or cGAMP **(B)**. Cultures were monitored  
286 at indicated time points post challenge for relative *IFIT1* mRNA expression by Q-RT-PCR (top  
287 panels). Error bars indicate S.E.M. from values obtained from cells from three individual  
288 experiments.

289

290 **Figure S6. Absence of innate immune responses in parental PM1 T-cells upon**  
291 **transduction with lentiviral vectors containing capsid-destabilizing mutations in capsid**

292 **(A)** Representative immunoblot of lentivirus vector inocula

293 **(B)** Reporter GFP expression in parental PM1 T-cells 72 hours post transduction by FACS  
294 analysis

295 (C) Relative expression of *IFIT1* and *MX2* by Q-RT-PCR

296 Error bars indicate S.E.M. from values obtained from cells from three individual experiments.

297

298 **Figure S7. Analysis of the cGAS/STING pathway in mouse T-cell lines**

299 Indicated mouse T-cell lines were either mock-electroporated or electroporated with plasmid

300 DNA (A-B), and electroporated either with c-di-UMP or cGAMP (C-D). Cultures were

301 monitored at indicated time points post challenge for relative *Ifit1* mRNA expression by Q-RT-

302 PCR (A, C) and for release of bioactive IFN into the culture supernatant (B, D). Error bars

303 indicate S.E.M. from values obtained from cells from three individual experiments.

304

305 **Figure S8. MLV-based retroviral transduction fails to trigger cGAS-dependent innate**

306 **immune reactions in mouse YAC-1 T-cells**

307 Parental and cGAS KO T-cell lines were transduced with VSV-G MLV GFP vectors in the

308 absence and presence of AZT and monitored, at indicated time points, for:

309 (A) Reporter GFP expression by FACS analysis

310 (B) Relative expression of *Ifit1* mRNA by Q-RT-PCR

311 (C) Relative expression of *Mx2 mRNA* by Q-RT-PCR

312 Error bars indicate S.E.M. from values obtained from cells from three individual experiments.

313

314

315

316

317

Elsner and Ponnurangam *et al.*, Suppl. Fig. 1

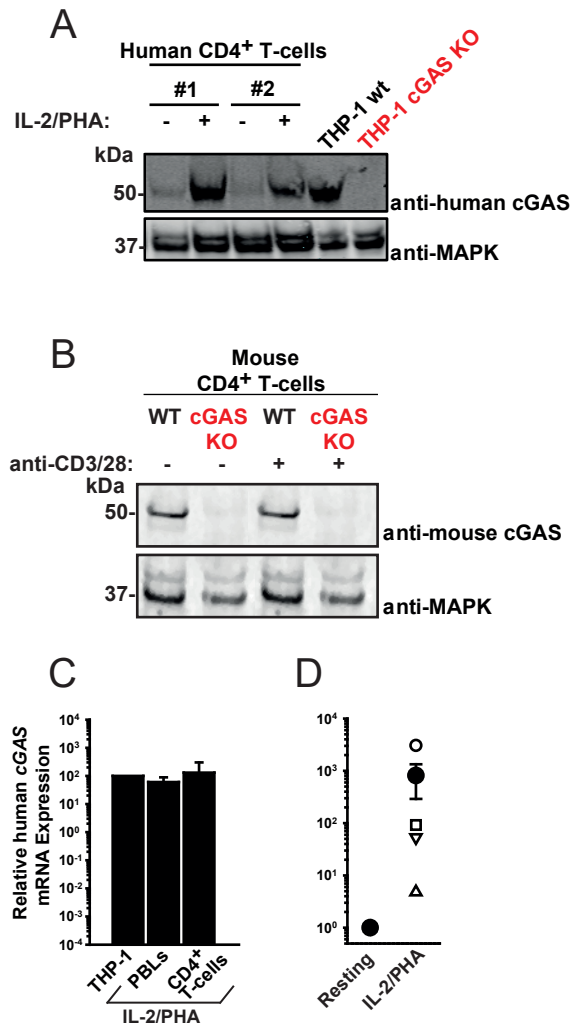

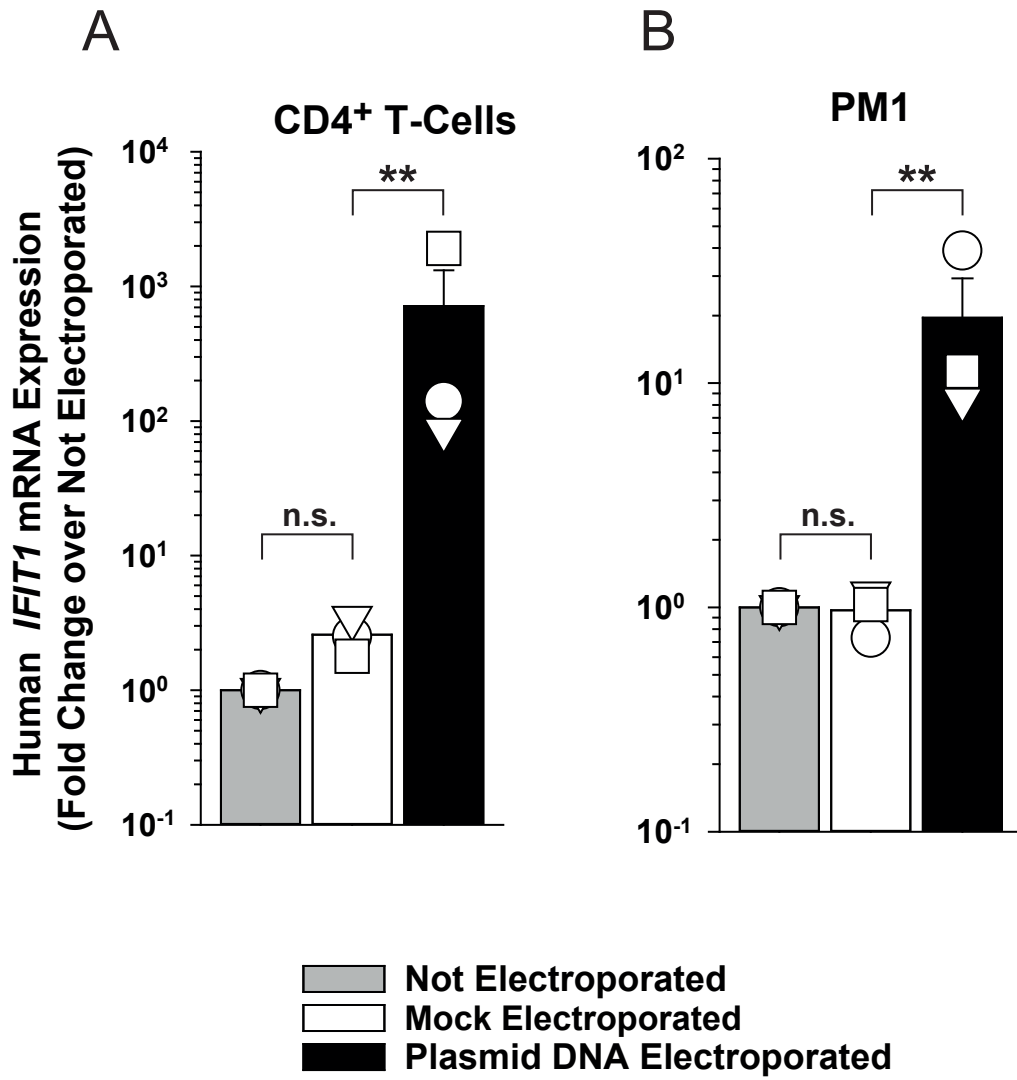

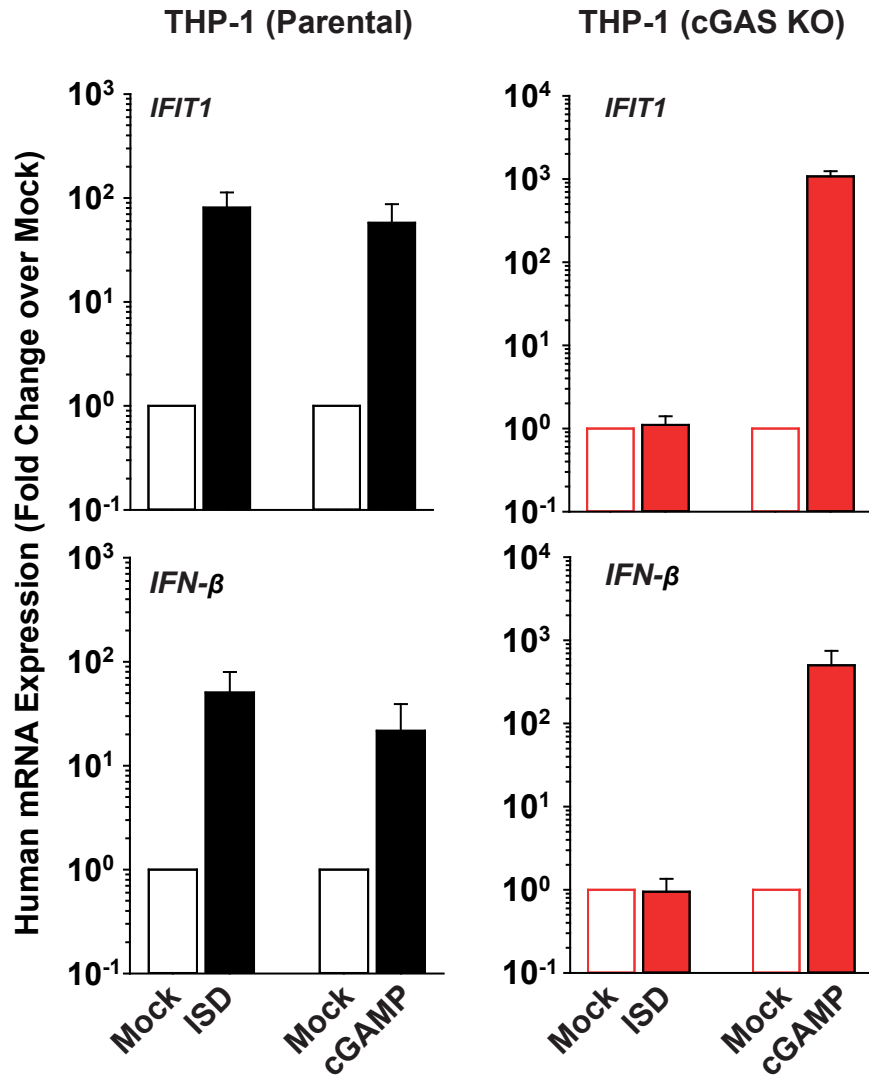

A

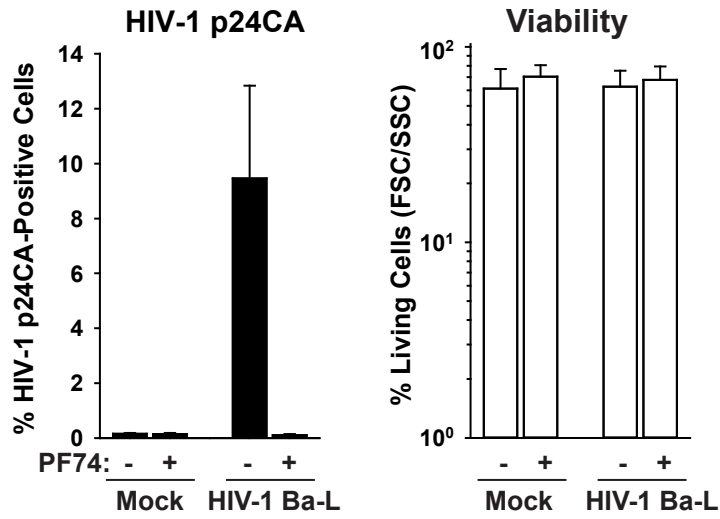

B

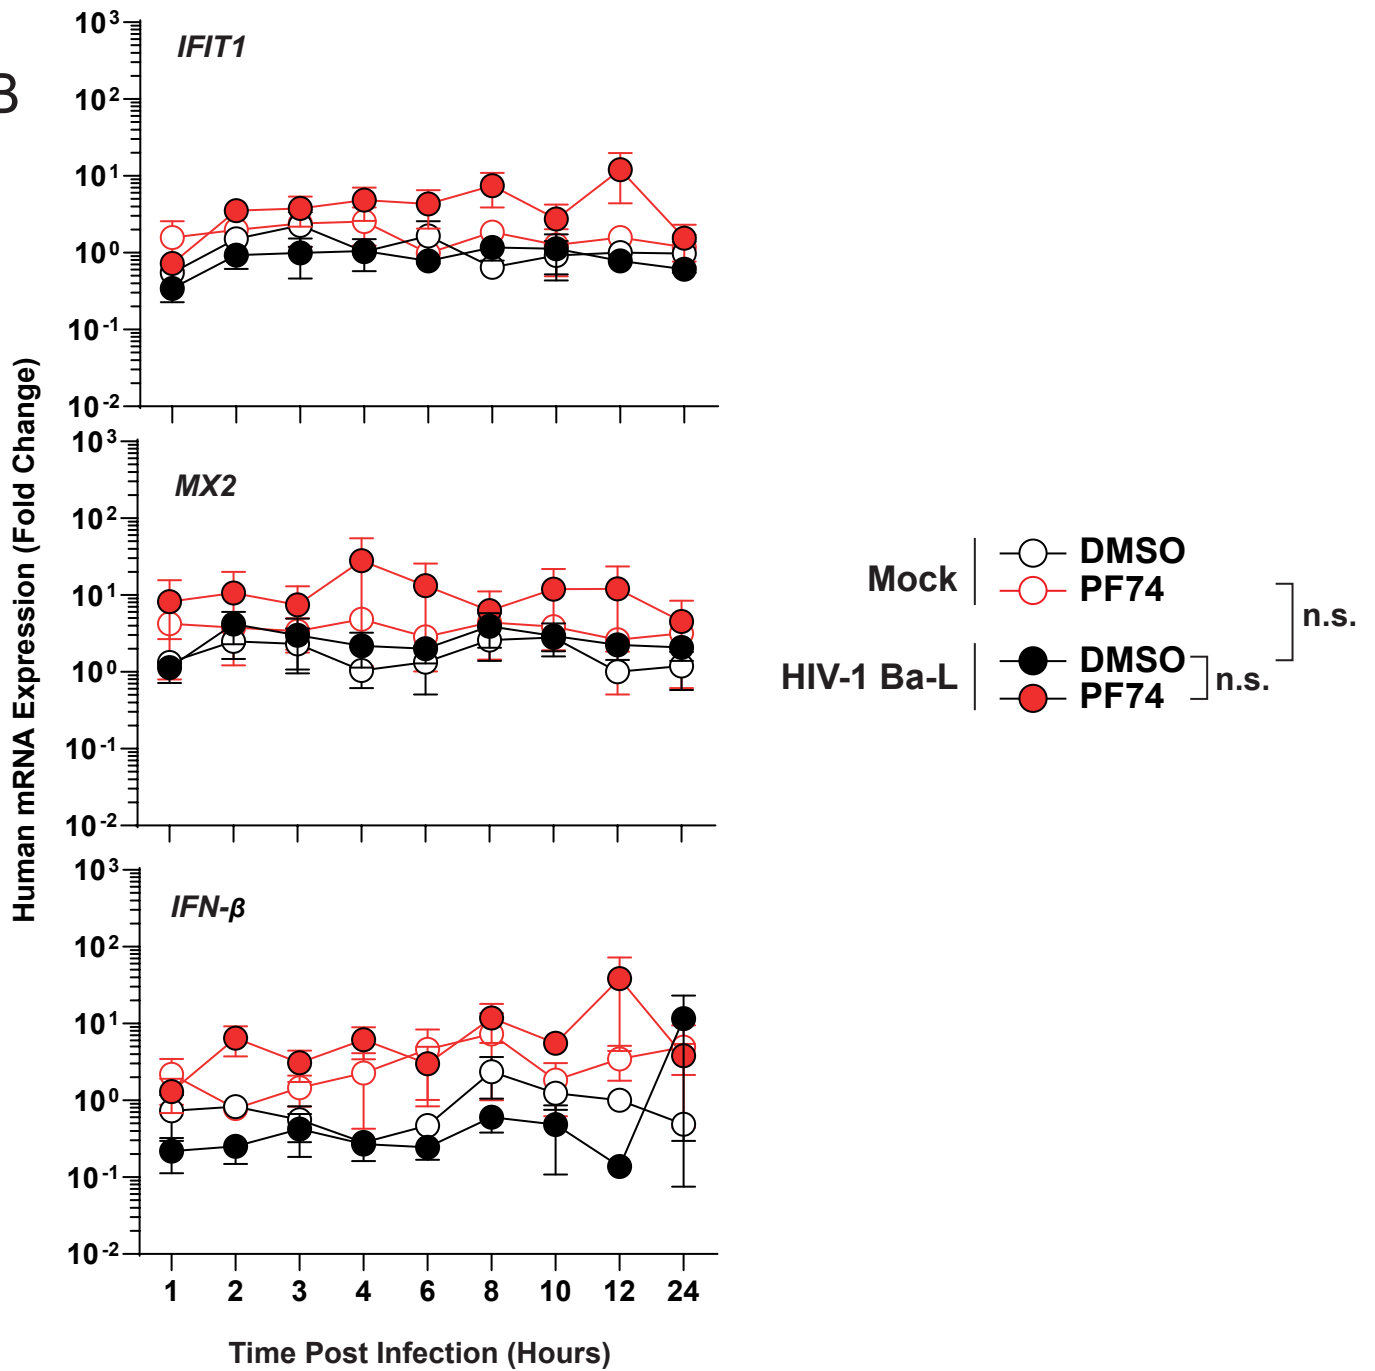



### Human T-Cell Lines

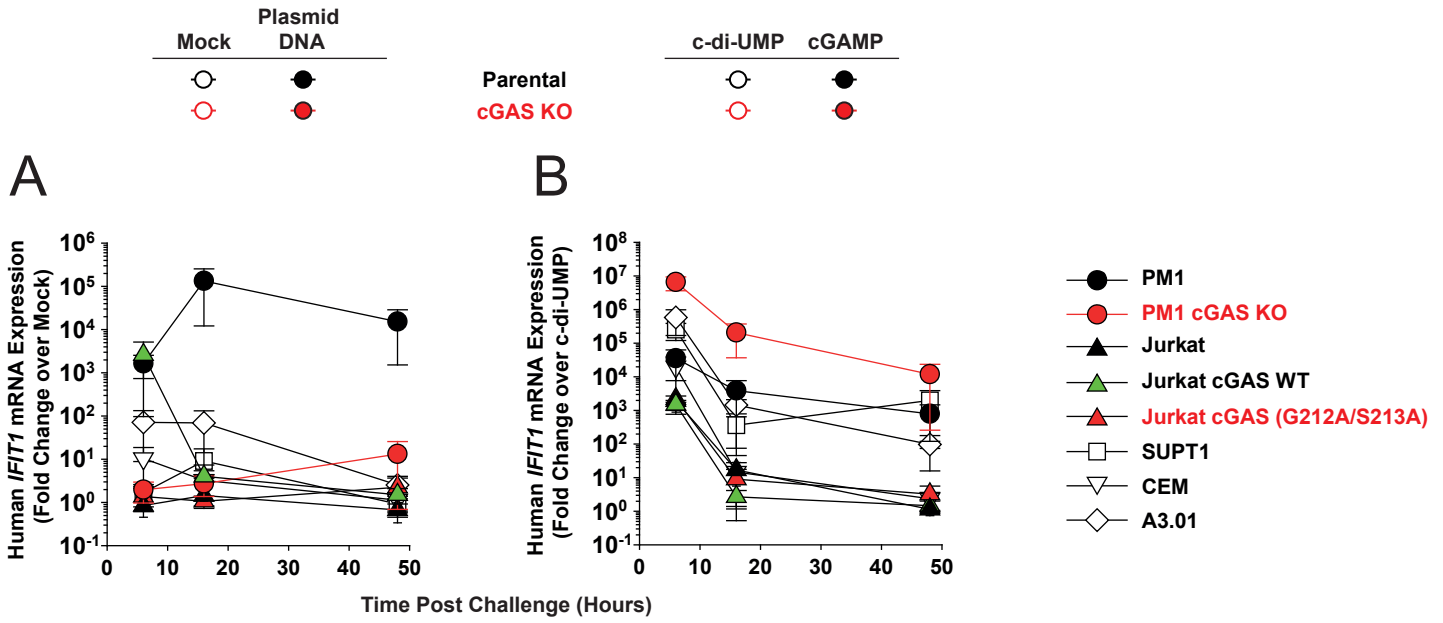

A

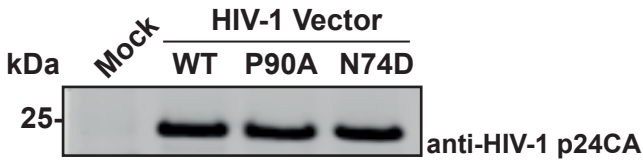

B

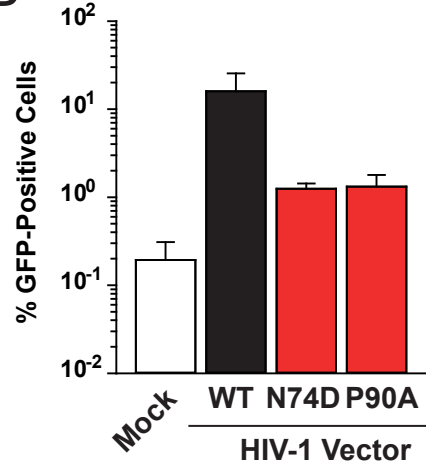

C

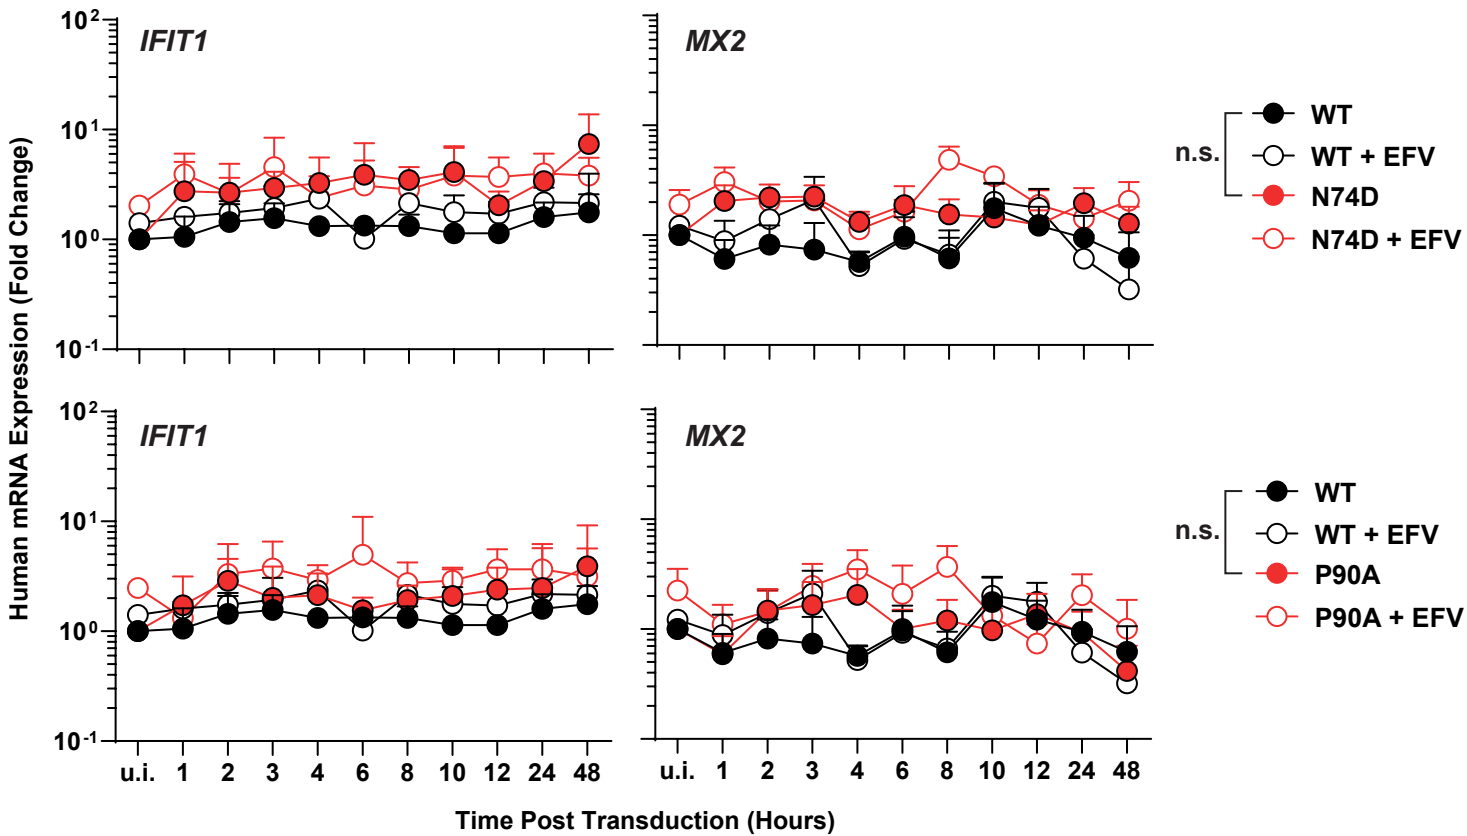

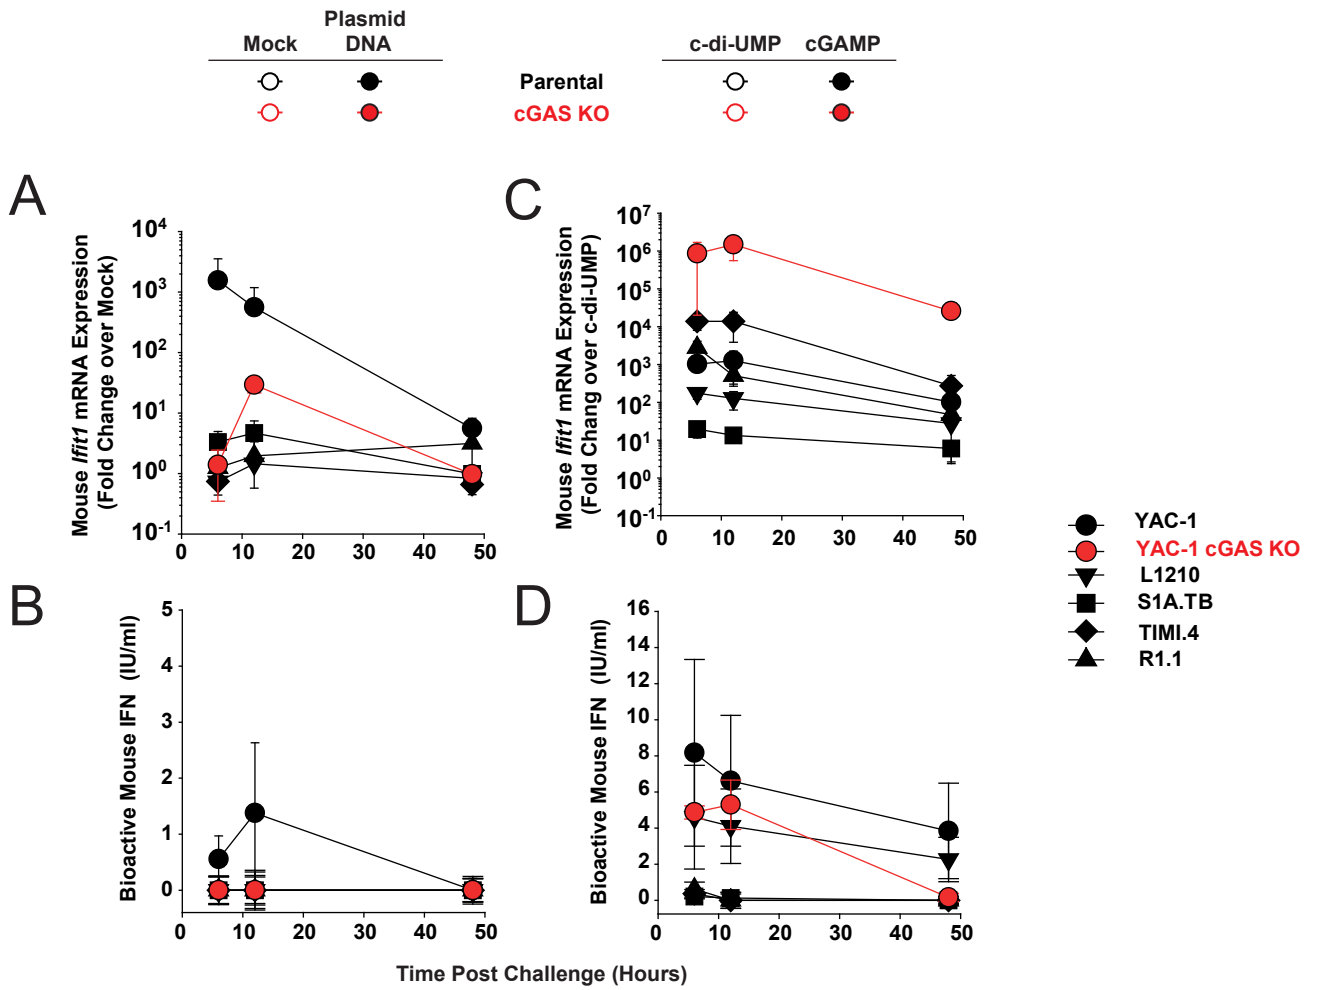

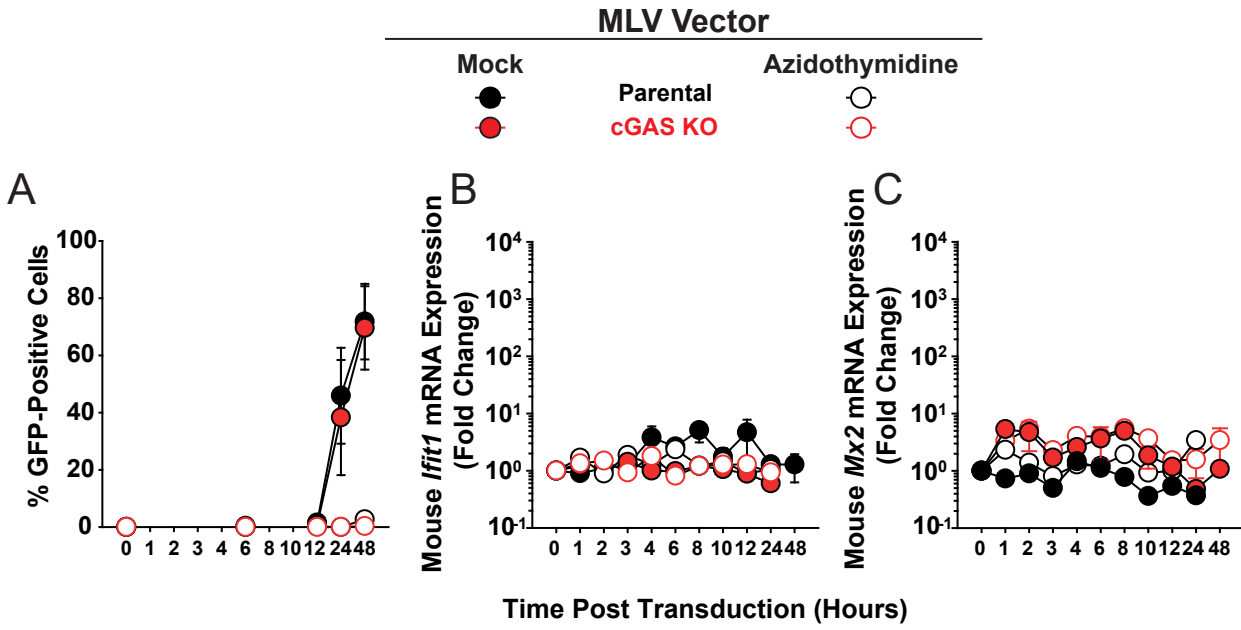

Supplement: pnas.2002481117.sapp.pdf [file pnas.2002481117.sapp.pdf]
